# Supplementary material for: Spatial Distribution of Cuticular Drusen and its Association with Category-Specific Progression Risk in Intermediate AMD
Source: Research Square preprint supplement (doi:10.21203/rs.3.rs-8504851/v1), 2026-01-29
Supplement: Supplementary file 1 [file 7accc626f99aff2f31189adb.xlsx]

## Sheet: Sheet1
Cluster Name	Group	No.	iRORA_BL (%)	AVLs_BL (%)	Progression of AMD in 2 years (%)
Diffuse	1	9	1 (11.1%)	0 (0%)	0 (0%)
Predominantly central	2	50	3 (6%)	0 (0%)	1 (2%)
Predominantly peripheral	3	28	2 (7.1%)	4 (14.3%)	4 (14.3%)
BL: Baseline
iRORA: Incomplete Retinal Pigment Epithelium and Outer Retinal Atrophy
AVLs: Acquired vitelliform lesions
