# Supplementary material for: Spatial Distribution of Cuticular Drusen and its Association with Category-Specific Progression Risk in Intermediate AMD
Source: Research Square preprint supplement (doi:10.21203/rs.3.rs-8504851/v1), 2026-01-29
Supplement: Supplementary file 2 [file c731e59f5b7aa8d960672f73.xlsx]

## Sheet: Sheet1
	Comparison	P value	Odds ratio
iRORA at baseline	1 vs 2	0.49	0.52
	1 vs 3	1	0.62
	2 vs 3	1	1.2
AVL at baseline	1 vs 2	1	0
	1 vs 3	0.56	Infa
	2 vs 3	0.01*	Inf a
Progression to late AMD at 2 years	1 vs 2	1	Inf a
	1 vs 3	0.55	Inf a
	2 vs 3	0.05	7.94
a: Inf indicates an infinite odds ratio due to zero events in one group.
*: statistically significant
