# Supplementary material for: Spatial Distribution of Cuticular Drusen and its Association with Category-Specific Progression Risk in Intermediate AMD
Source: Research Square preprint supplement (doi:10.21203/rs.3.rs-8504851/v1), 2026-01-29
Supplement: Supplementary file 3 [file f0d6e9dd81c1c9a5c23b65af.xlsx]

## Sheet: Sheet1
ETDRS Zone	Area mm2	cuticular drusen density count/mm2 （SD）
Central	0.79	6.14 (3.89)
Inner Ring	6.28	2.15 (1.18)
Outer Ring	21.21	1.18 (0.81)
